# Supplementary material
Source: publisher site journal article supplement (https://www.dovepress.com/article/457221)
Supplement: Supplementary file 1 [file get_supplementary_file.php]

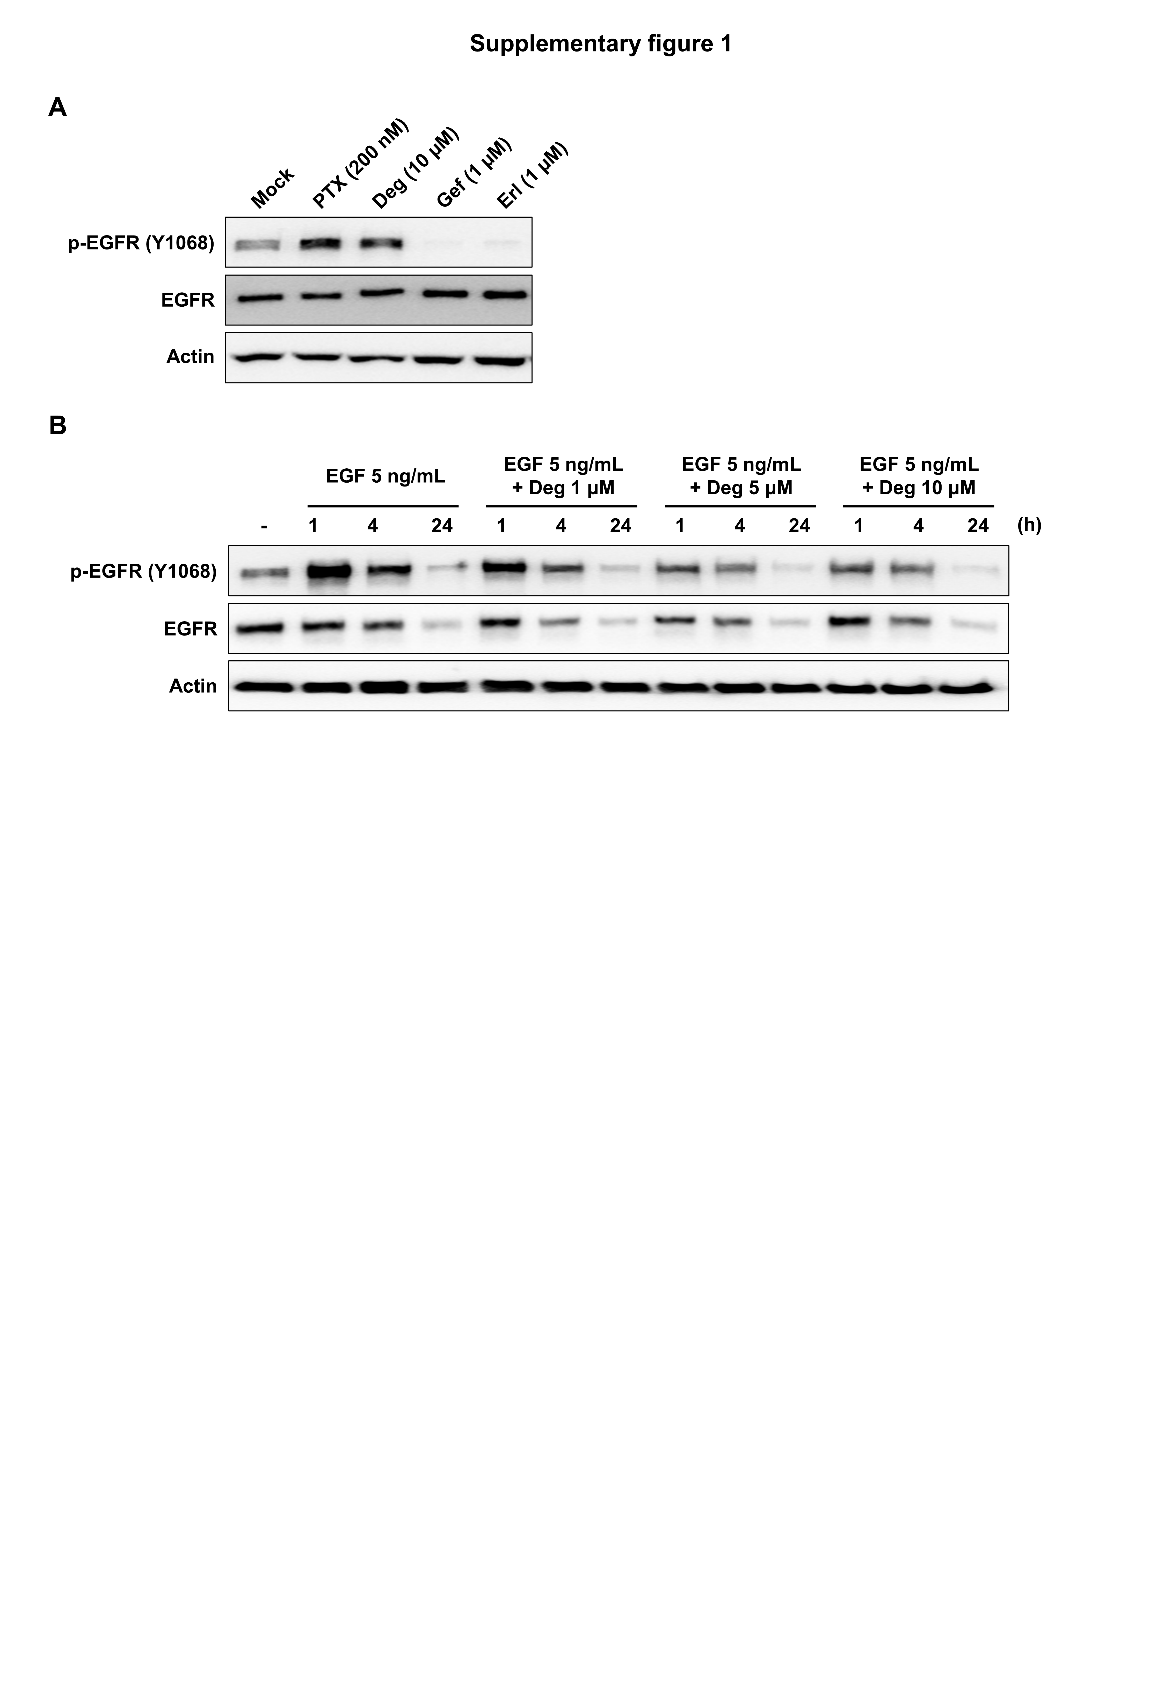


**Supplementary Figure 1.** Comparison of mechanisms of action between deguelin and the EGFR inhibitors gefitinib and erlotinib (A) SKOV3-TR cells were treated with paclitaxel (200 nM), deguelin (10 μM), gefitinib (1 μM), and erlotinib (1 μM) for 48 h. The expression and phosphorylation levels of EGFR were examined by immunoblotting. (B) SKOV3-TR cells were treated with EGF (5 ng/mL) together with deguelin (0, 1, 5, and 10 μM) in RPMI 1640 medium supplemented with 2% fetal bovine serum and 1% penicillin/streptomycin for 1 h, 4 h, and 24 h, respectively. Immunoblotting was used to determine the expression of EGFR and its phosphorylation form. Actin was used as a loading control.

**Supplementary Table 1. Sequences of primers**

| Targets | Sequence of primer |
| --- | --- |
| *EGFR* | F_ 5’- CGCAAGTGTAAGAAGTGCGAA -3’ |
| R_ 5’- CGTAGCATTTATGGAGAGTGAGTCT -3’ |
| *ERBB2* | F_ 5’- TAAGGACCCTCCCTTCTGCG -3’ |
| R_ 5’- AAAGACCACCCCCAAGACCA -3’ |
| *BCL-2* | F_ 5’- GGCAATGTGACTTTTTCCAA -3’ |
| R_ 5’- GGCTGATATTCTGCAACACTG -3’ |
| *BCL-XL* | F_ 5’- GTAAACTGGGGTCGCATTGT -3’ |
| R_ 5’- TGGATCCAAGGCTCTAGGTG -3’ |
| *MCL-1* | F_ 5’- CTCCCCACCAAGAGTCCACA -3’ |
| R_ 5’- CCCAAACCACTTGGGGTGTC -3’ |
| *BAX* | F_ 5’- CCAGCTGCCTTGGACTGT -3’ |
| R_ 5’- ACCCCCTCAAGACCACTCTT -3’ |
| *SURVIVIN* | F_ 5’- CCCATAGAGGAACATAAAAAGCAT-3’ |
| R_ 5’- TCAAAAATTCACCAAGGGTTAATT-3’ |
| *GAPDH* | F_ 5’- GTCTCCTCTGACTTCACAGCG -3’ |
| R_ 5’- ACCACCCTGTTGCTGTAGCCAA -3’ |
